# Supplementary material for: Heterostructured NiFe oxide/phosphide nanoflakes for efficient water oxidation
Source: Royal Society of Chemistry journal article supplement (doi:10.1039/c9dt01275c), 2019-01-01
Supplement: c9dt01275c1.pdf [file c9dt01275c1.pdf]

*Supporting Information*

**Heterostructured NiFe Oxide/Phosphide Nanoflakes for Efficient  
Water Oxidation**

*Ailing Yan,<sup>1</sup> Hao Wan,<sup>1</sup> Gen Chen,<sup>1</sup> Ning Zhang,<sup>1</sup> Wei Ma,<sup>2</sup> Xiaohe Liu,<sup>1\*</sup> Yijun Cao<sup>2\*</sup>  
& Renzhi Ma<sup>3</sup>*

<sup>1</sup> State Key Laboratory of Powder Metallurgy and School of Materials Science and Engineering, Central South University, Changsha, Hunan 410083, P. R. China. Email: liuxh@csu.edu.cn

<sup>2</sup> Henan Province Industrial Technology Research Institute of Resources and Materials, Zhengzhou University, Zhengzhou, Henan 450001, P. R. China. Email: yijuncao@126.com

<sup>3</sup> International Center for Materials Nanoarchitectonics, National Institute for Materials Science, Namiki 1-1, Tsukuba, Ibaraki 305-0044, Japan.

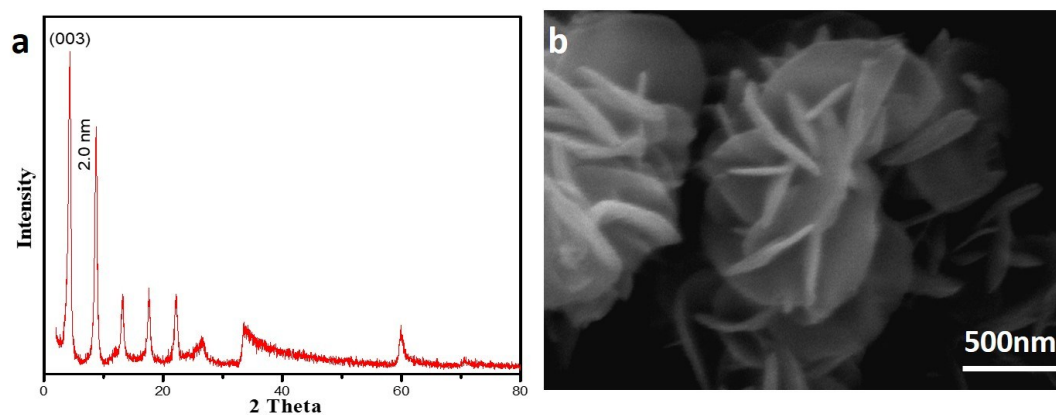

**Figure S1.** (a) The XRD pattern and (b) TEM image of Ni<sub>2/3</sub>Fe<sub>1/3</sub> LDH.

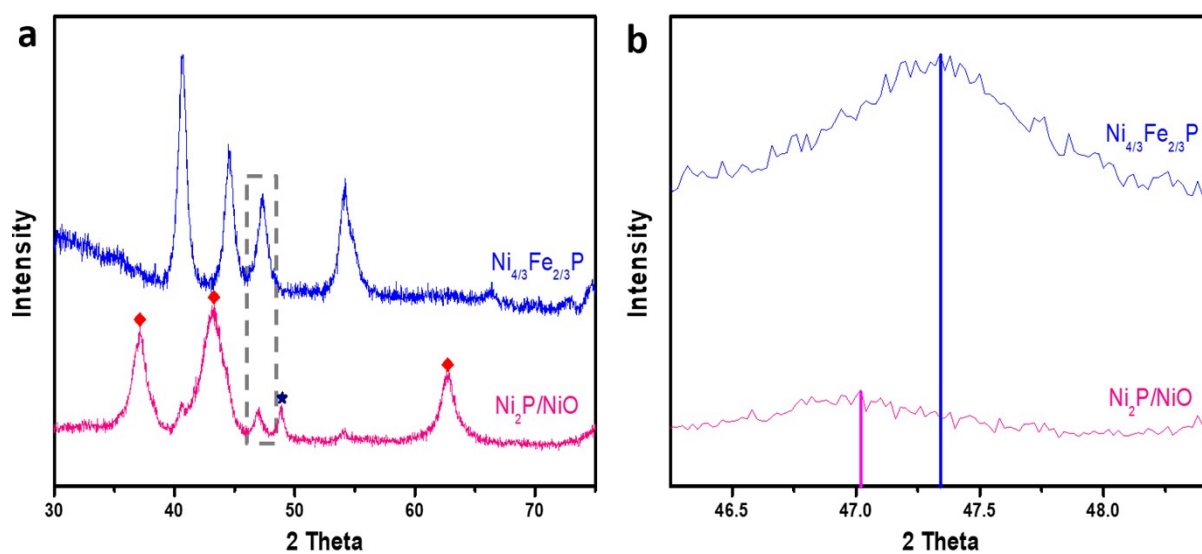

Figure S2 (a) XRD patterns of monometallic  $\text{Ni}_2\text{P}/\text{NiO}$  and the  $\text{Ni}_{4/3}\text{Fe}_{2/3}\text{P}$  samples, (b) magnification of the (210) peak of  $\text{Ni}_{4/3}\text{Fe}_{2/3}\text{P}$  and  $\text{Ni}_2\text{P}$  phases as marked by the framework in (a). “◆” and “★” refer to NiO phase and possible tetragonal  $\text{Ni}_{12}\text{P}_5$  ( $a = 8.65 \text{ \AA}$ ,  $c = 5.07 \text{ \AA}$ ; space group:  $I4/m$ ) impurity, respectively. A clear shift towards higher diffraction angle could be observed for  $\text{Ni}_{4/3}\text{Fe}_{2/3}\text{P}$ , indicating the successful doping of Fe atoms into the  $\text{Ni}_2\text{P}$  lattices.

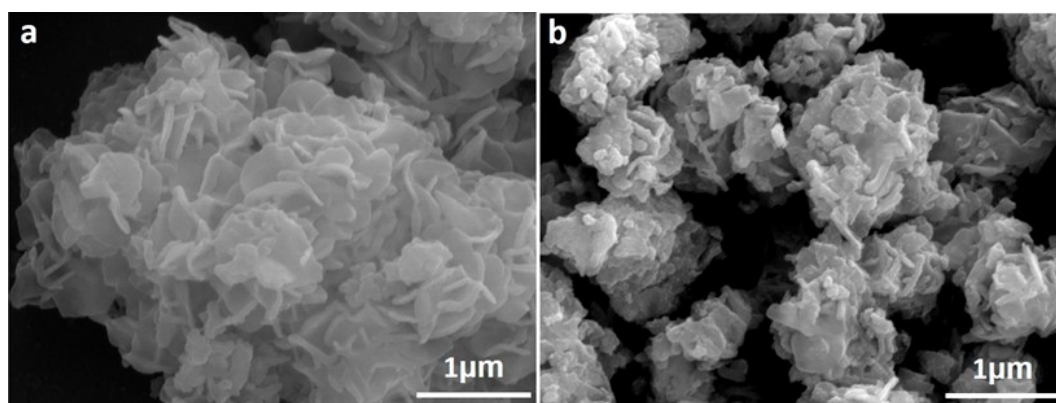

Figure S3. TEM images of (a)  $\text{Ni}_{4/3}\text{Fe}_{2/3}\text{P}$ -1 and (b)  $\text{Ni}_{4/3}\text{Fe}_{2/3}\text{P}$ -2.

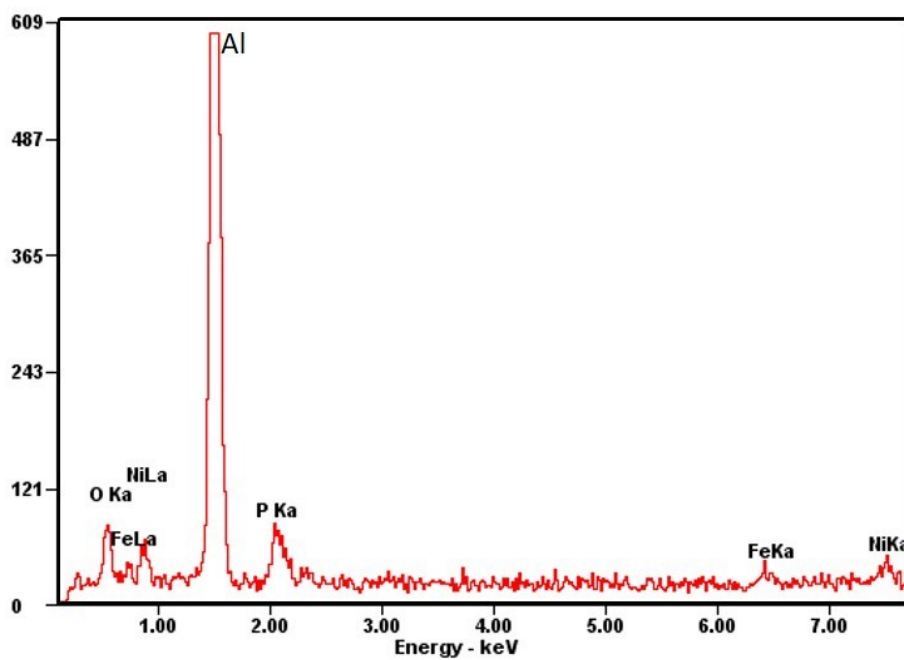

**Figure S4.** EDS spectrum of  $\text{Ni}_{2/3}\text{Fe}_{1/3}\text{O}/\text{Ni}_{4/3}\text{Fe}_{2/3}\text{P}$  (the Al signal was from the conductive Al foil substrate).

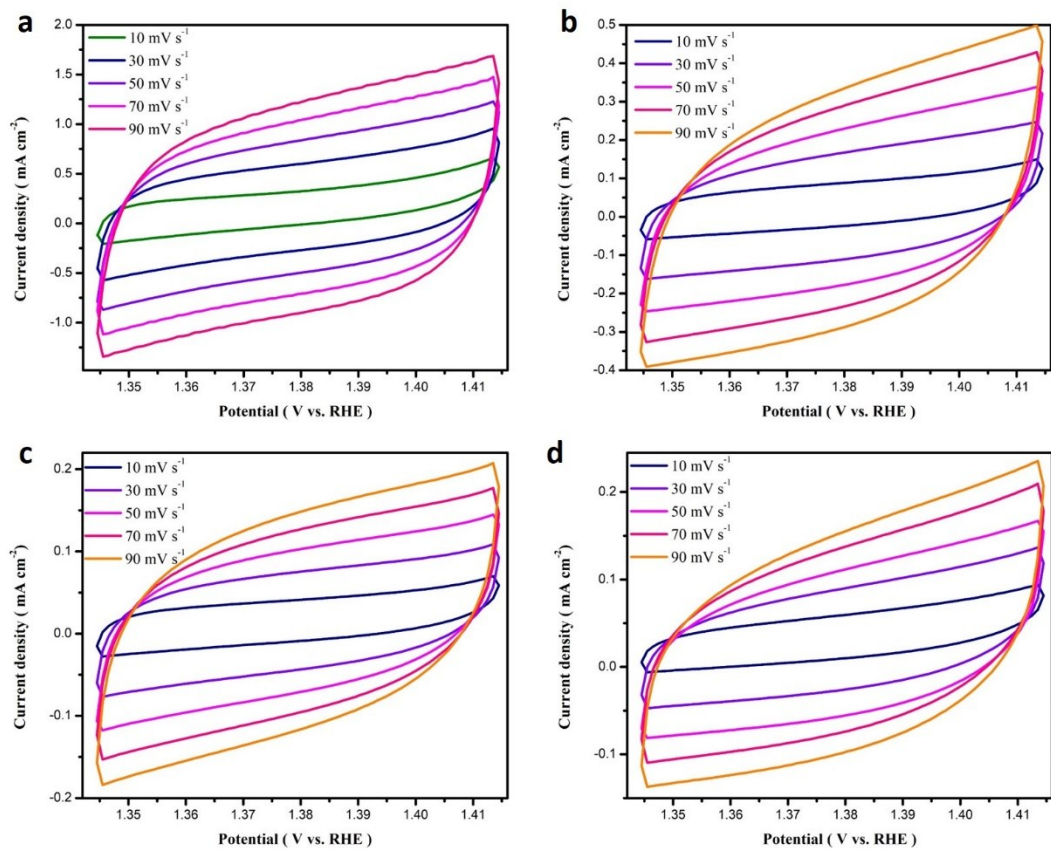

**Figure S5.** The CV curves of (a) Ni<sub>2/3</sub>Fe<sub>1/3</sub>O/ Ni<sub>4/3</sub>Fe<sub>2/3</sub>P, (b) Ni<sub>2/3</sub>Fe<sub>1/3</sub>O, (c) Ni<sub>4/3</sub>Fe<sub>2/3</sub>P-1 and (d) Ni<sub>4/3</sub>Fe<sub>2/3</sub>P-2.
